# Supplementary material for: Effect of endometrial thickness on obstetric and neonatal outcomes in assisted reproduction: a systematic review and meta-analysis
Source: PubMed Central journal article supplement (PMC10262454; doi:10.1186/s12958-023-01105-6), 2023-06-13

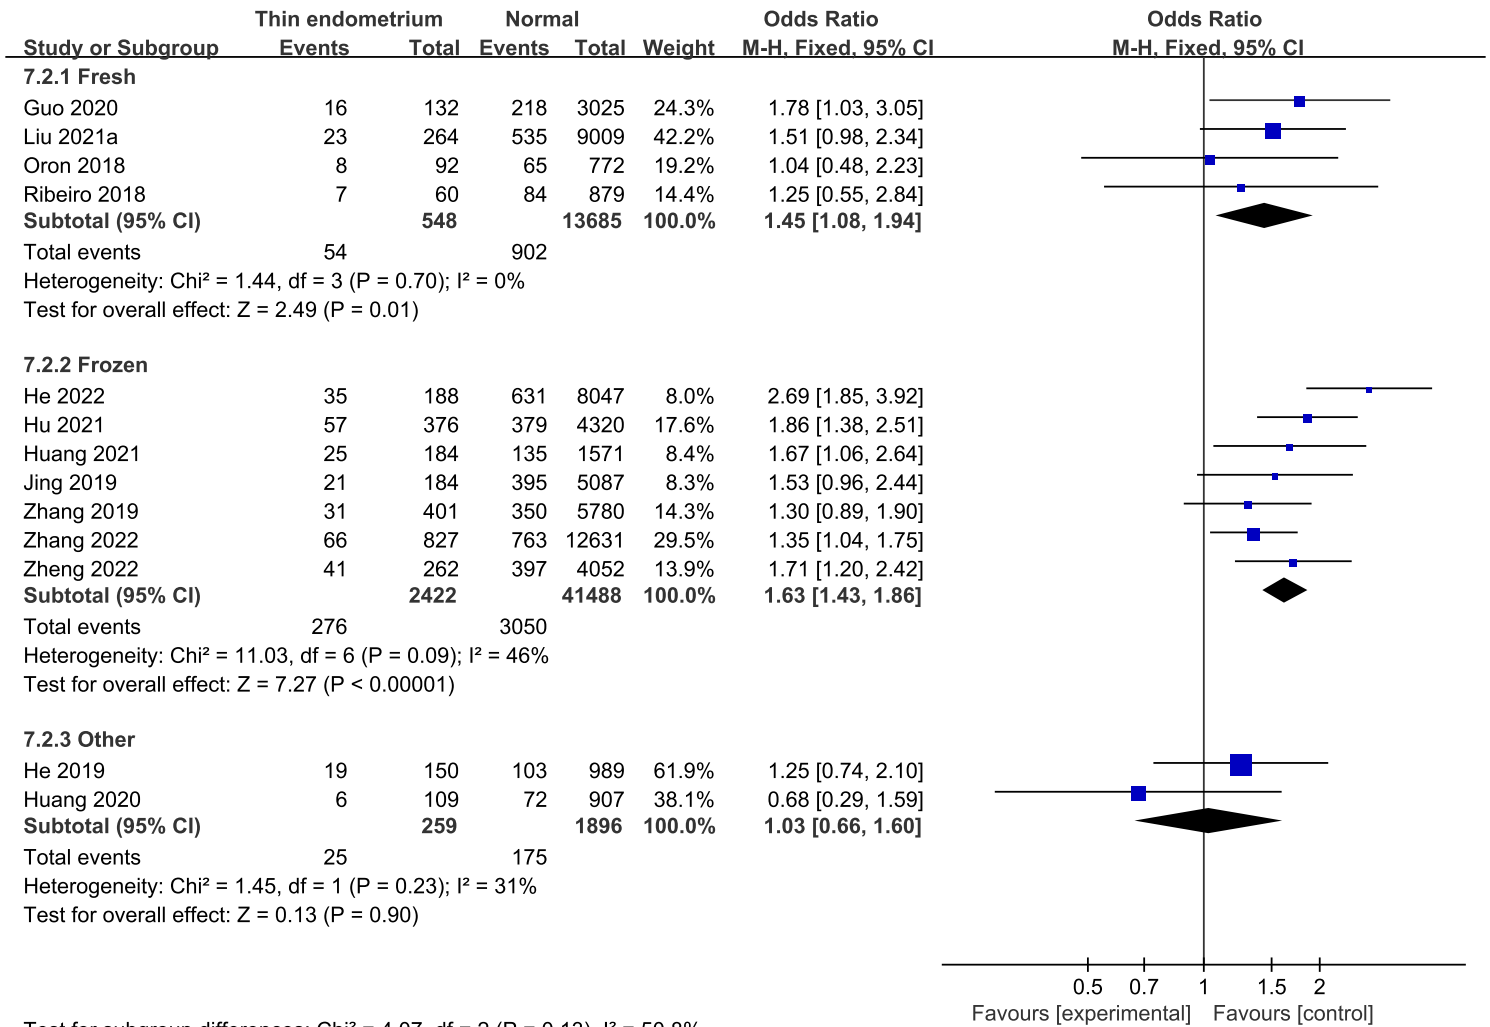

Supplement: 12958_2023_1105_MOESM5_ESM.pdf [file 12958_2023_1105_MOESM5_ESM.pdf]
